# Supplementary material for: Examining A Reintegration of Islamic Values toward Good Islamic Governance
Source: Research Square preprint supplement (doi:10.21203/rs.3.rs-7555946/v1), 2025-11-10
Supplement: Supplementary file 1 [file b48a206ecac6594857d97c45.docx]

Table 1 Corruption Perceptions Index (CPI) 2023: Malaysia, Indonesia, Turkey

| Countries | CPI rank |
| --- | --- |
| Malaysia | 47 |
| Indonesia | 115 |
| Turkey | 115 |

Source: Corruption Perceptions Index (CPI) 2023

Table 2 Comparison of Islamic Governance Models

| **Aspects** | **Leadership era** | | | | |
| --- | --- | --- | --- | --- | --- |
| **Propeth Muhammad** | **Abu Bakr as Siddiq** | **Umar ibn Al-Khattab** | **Uthman ibn Affan** | **Ali ibn Abi Talib** |
| Core Principles | Al-'Adālah (justice), Shura (consultation), Mas'uliyyah (accountability), and inclusivity through the Madinah Charter. | Shura (consensus), Amanah (trust), and Mas'uliyyah (accountability). | Al-'Adālah (justice), Mas'uliyyah (accountability), and administrative reforms. | Amanah (trust) in economic governance and infrastructure development. | Al-'Adālah (justice) and ethical leadership amidst political conflicts. |
| Social Context | A multicultural society in Madinah consisting of Muslims, Jews, and other communities requiring high inclusivity. | Reuniting Arab tribes after the death of Prophet Muhammad to ensure political stability. | Expansion of the Islamic state requiring more complex administrative systems. | Economic growth accompanied by rising nepotism. | Sectarian conflicts and political fragmentation leading to instability. |
| Legal Structure | The Madinah Charter as the first constitution regulating the rights and responsibilities of all citizens fairly. | Upholding Islamic values through consensus-based legal enforcement. | Establishment of the Diwan system for financial and legal administration. | Focus on economic policies, yet criticized for nepotism in appointments. | Emphasis on legal integrity and social justice amidst political chaos. |
| Public Consultation (*Shura*) | Involvement of communities and tribal leaders in decision-making through consultation. | Consultation with senior figures and the public before making significant decisions. | *Shura* was expanded to involve representatives from various regions in governance. | Limited consultation amidst criticisms of reduced public involvement. | Continued *Shura* despite operating in a politically divided environment. |
| Economic Management | Fair distribution of wealth through zakat and prohibition of exploitative practices like usury. | Economic stability by enforcing zakat obligations and addressing early financial challenges. | Economic reforms through the Diwan system to distribute state revenues fairly. | Large-scale infrastructure development, yet facing criticism for nepotistic resource management. | Redistribution of resources fairly amidst limited funds due to internal conflicts. |
| Key Achievements | Building an inclusive, peaceful, and just society based on Islamic laws. | Uniting Arab tribes, upholding trust-based leadership, and ensuring early political stability. | Major reforms in administration, finance, and justice across the expanding Islamic territories. | Economic and infrastructure advancements, though criticized for nepotism. | Upholding Islamic ethical values amidst sectarian and political conflicts. |
| Challenges | Integrating a multicultural society without marginalizing non-Muslim communities. | Stabilizing the state amidst tribal rebellions refusing zakat obligations. | Managing the expansion of Islamic territories while maintaining administrative efficiency and justice. | Addressing nepotism and rising political tensions during his leadership. | Handling internal and sectarian conflicts leading to political fragmentation. |
| Modern Relevance | Inclusivity, legal justice, and public participation as a foundation for ethical governance. | The importance of trust-based leadership and consensus for political stability. | Administrative efficiency and economic justice as a model for modern bureaucracies. | Balancing economic development with the need for transparency and accountability. | Integrity in law enforcement and justice amidst political challenges |

Source: Generate by author

Table 3 Comparison of Good Governance and Good Islamic Governance

| **Aspects** | **Good Governance** | **Good Islamic Governance** |
| --- | --- | --- |
| Foundational Basis | Secular framework emphasizing administrative efficiency | Ethical framework rooted in Islamic principles |
| Core Principles | Rule of law, accountability, transparency, participation | Justice (*al-'adālah*), consultation (*shura*), accountability (mas'uliyyah), trustworthiness (*amanah*) |
| Accountability | Accountability to institutions and legal frameworks | Dual accountability to institutions and God (spiritual and moral responsibility) |
| Participation | Focus on democratic participation | Consultative participation emphasizing ethical inclusivity |
| Justice | Procedural justice ensuring fairness under the law | Substantive justice prioritizing fairness, equity, and societal welfare (*maslahah*) |
| Inclusivity | Ensures diversity and equality in governance | Grounded in ethical inclusivity, aligning with diverse moral and cultural values |
| Ethical Dimension | Primarily procedural; limited to institutional practices | Strong moral foundation guiding institutional and leadership behavior |

Source: Generate by author
